# Supplementary material for: Inclusion Body Myositis: Laser Microdissection Reveals Differential Up-Regulation of IFN-γ Signaling Cascade in Attacked versus Nonattacked Myofibers
Source: PubMed Central journal article supplement — Am J Pathol. 2011 Sep;179(3):1347–59. doi: 10.1016/j.ajpath.2011.05.055 (PMC3157228; doi:10.1016/j.ajpath.2011.05.055), 2011-09
Supplement: mmc1.pdf [file mmc1.pdf]

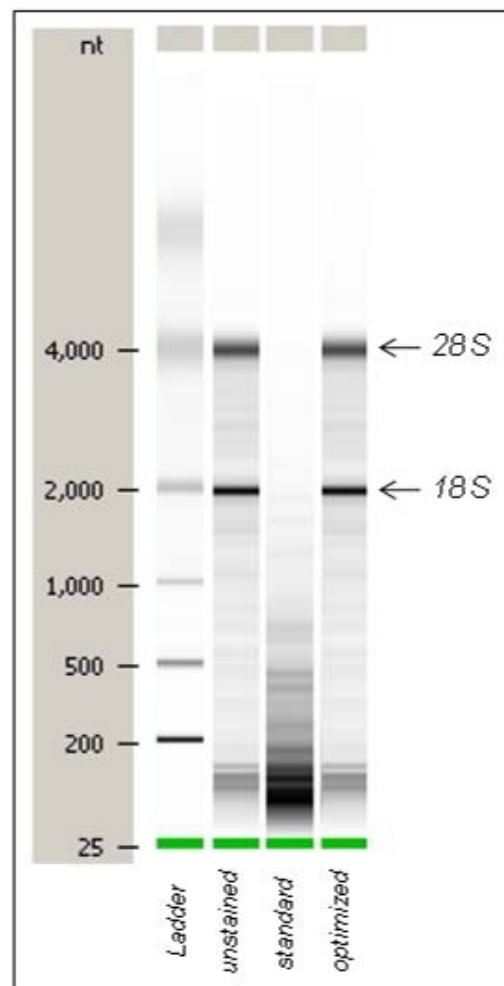

Supplemental Figure S1

**Analysis of RNA quality under immunofluorescent staining conditions.**

Agilent Bioanalyzer Gel Electrophoresis was run according to the manufacturer's recommendations. RNA Quality was assessed by evaluation of the delineation of the bands. As a positive control, we used unstained tissue (straight from  $-80^{\circ}\text{C}$ ) which shows clearly delineated 18S and 28S RNA bands ("unstained"). Under standard conditions (i.e. following a traditional immunofluorescent staining and laser microdissection protocol which takes at least 1,5 hours at room temperature), RNA is rapidly degraded, severely compromising transcriptome analysis. In this study, a rapid staining protocol that largely preserves RNA was used ("optimized").
